# Supplementary material
Source: bioRxiv or medRxiv preprint supplement (https://www.biorxiv.org/highwire/filestream/131784/field_highwire_adjunct_files/1/361105-2.pdf)
Supplement: Supplementary file [file 361105-2.pdf]

**Disc Margin/  
Ventral Groove**

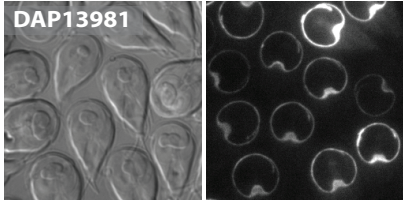

DAP13981  
Nek kinase

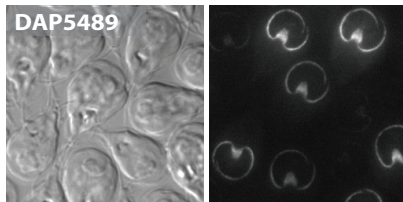

DAP5489  
Nek kinase

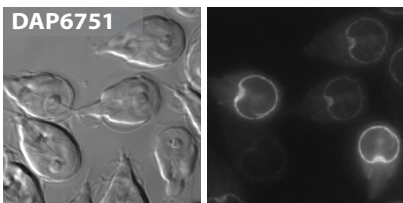

DAP6751  
novel

**Ventral Groove**

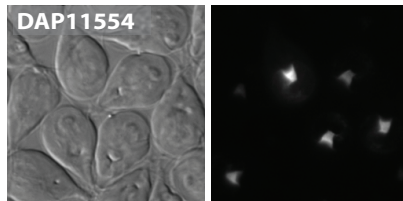

DAP11554  
Nek kinase

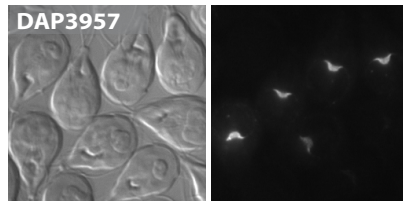

DAP3957  
Nek kinase, ankyrin repeat

**Disc Margin/Overlap Zone/  
Ventral Groove**

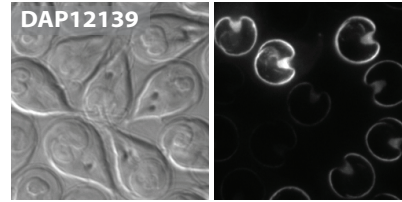

DAP12139  
ankyrin repeat

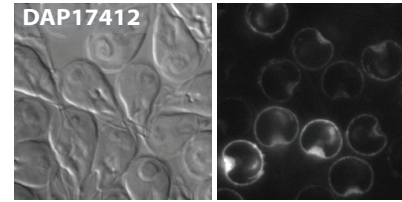

DAP17412  
novel

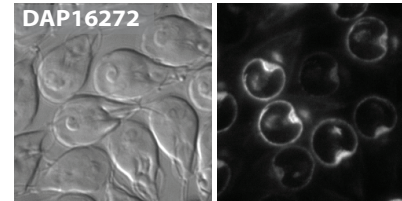

DAP16272  
Nek kinase, ankyrin repeat

**Body/Ventral Groove**

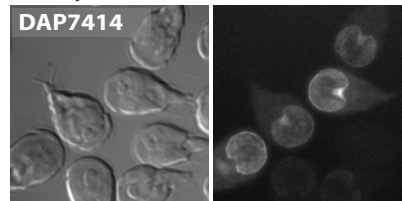

DAP7414  
novel

**Body/Overlap Zone/  
Disc Margin**

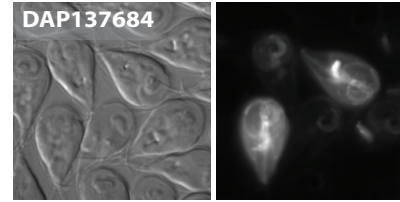

DAP137684  
ankyrin repeat

**Body/Overlap Zone/  
Ventral Groove/  
Disc Margin**

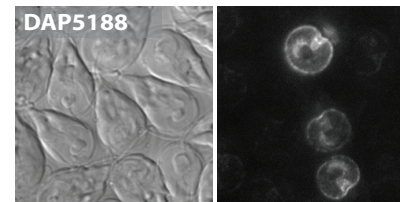

DAP5188  
ankyrin repeat

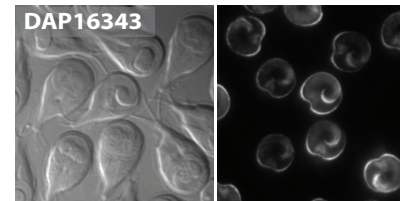

DAP16343  
median body protein (novel)

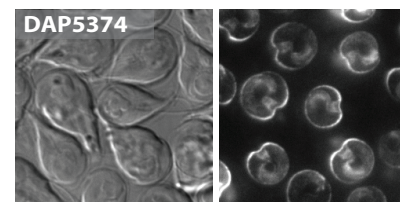

DAP5374  
CAP-GLY

**Overlap Zone**

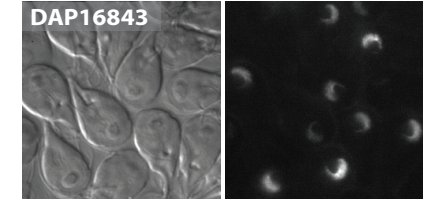

DAP16843  
ankyrin repeat

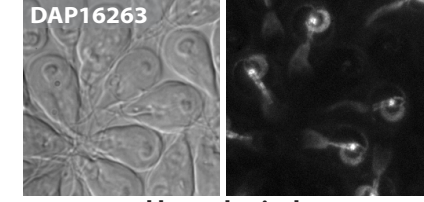

DAP16263  
conserved hypothetical
